# Supplementary material for: High-throughput discovery of organic cages and catenanes using computational screening fused with robotic synthesis
Source: PubMed Central journal article supplement (PMC6054661; doi:10.1038/s41467-018-05271-9), 2018-07-20
Supplement: 41467_2018_5271_MOESM2_ESM.pdf [file 41467_2018_5271_MOESM2_ESM.pdf]

## **Description of Additional Supplementary Files**

**File Name: Supplementary Data 1**

**Description:** The full set of computational structures generated in our study.
